# Supplementary material for: Helix kinks are equally prevalent in soluble and membrane proteins
Source: PubMed Central journal article supplement (PMC4285789; doi:10.1002/prot.24550), 2014-04-16
Supplement: prot0082-1960-SD1.pdf [file prot0082-1960-SD1.pdf]

# Helix kinks are equally prevalent in soluble and membrane proteins. Supplementary Information

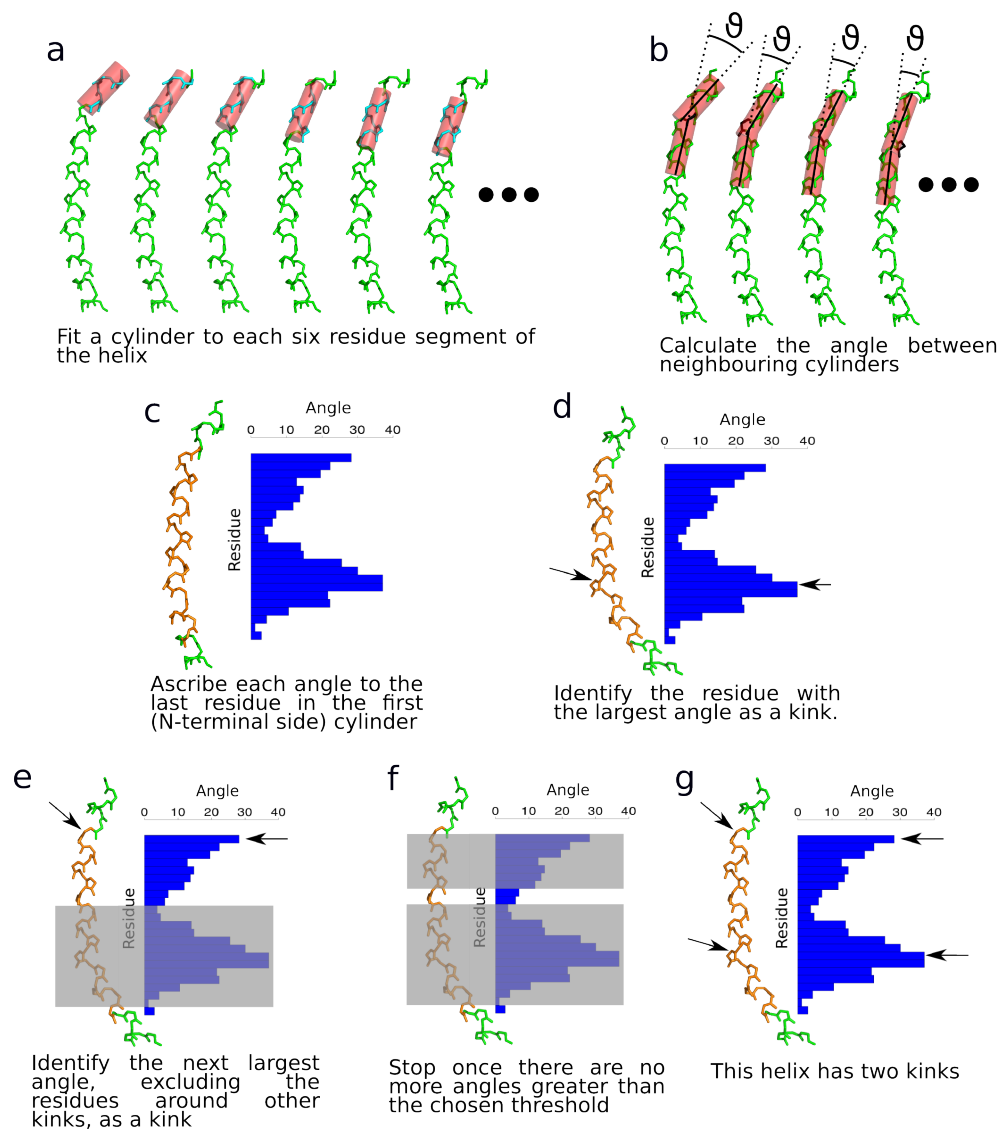

**Figure S1. Kink Finder algorithm.** (a) Axes are fitted to the backbone atoms of a sliding window of six residues. (b) and (c) These axes are used to calculate a local angle for each residue. (d) The residue with the largest angle is annotated as kinked (e) Additional kinks are identified at residues where the angle is  $\geq 20^\circ$ , the residue is at least four residues from another kink, and there is at least one residue with a local angle  $\leq 10^\circ$  the residue and all other kinks in the helix. The method for choosing the kink residue for each kink is shown in Figure S2.

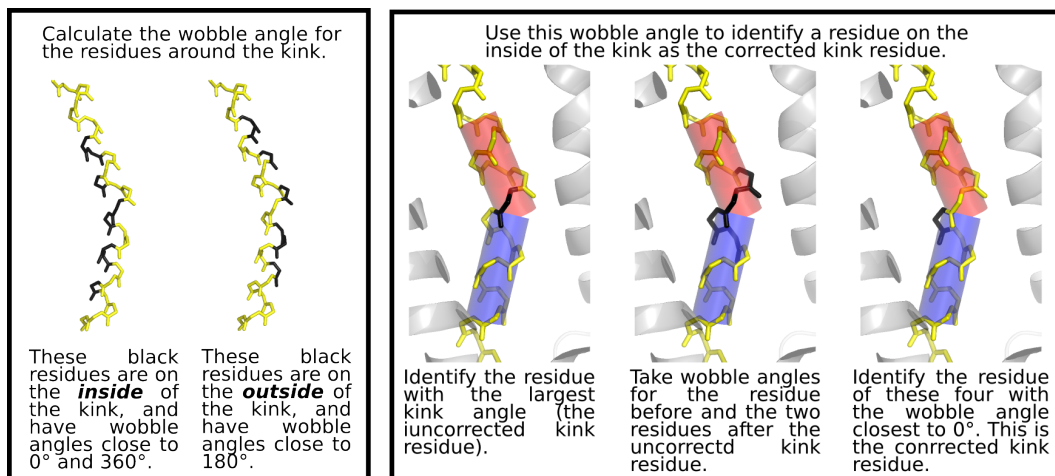

**Figure S2. Kink Finder's choice of kink residue.** Figure S3 explains the specific method used to determine the wobble angle.

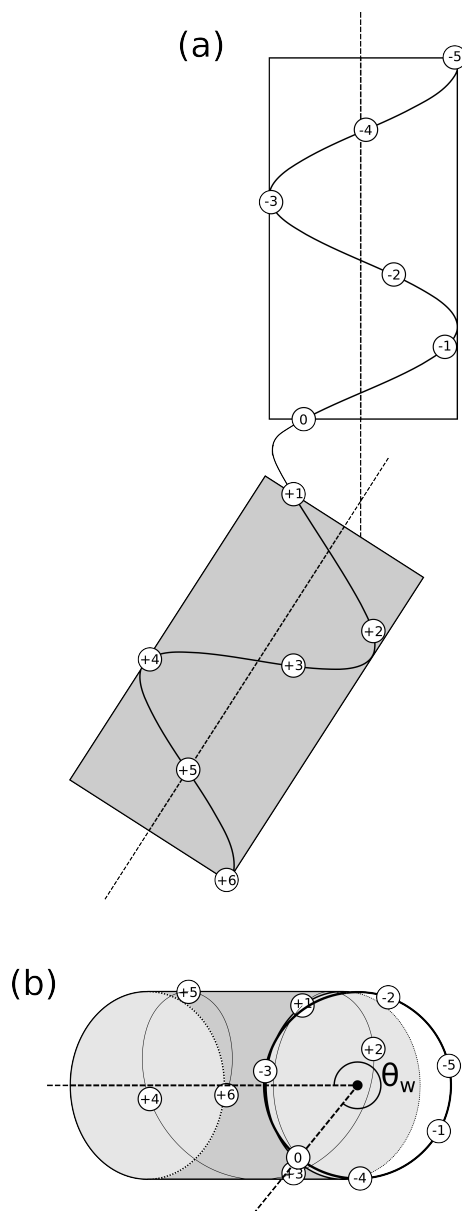

**Figure S3. Calculating the wobble angle** (a) Representation of a kinked helix with fitted cylinders. Only  $C\alpha$  atoms are shown, lettered sequentially -5 (N-terminus) to +6 (C-terminus). The fitted axes are shown by the dotted lines, and are in the plane of the page. The N-terminal cylinder is white, and the C-terminal cylinder is grey. (b) the same representation, rotated to look down the N-terminal axis. Atom 0 is in the plane of the page, and the C-terminal axis has been projected onto this plane. The wobble angle for each  $C\alpha$  atom is the angle between this vector, and the vector perpendicular to the n-terminal axis which passes through the  $C\alpha$  atom.  $\theta_w$  is the wobble angle for atom 0. The wobble angle is used to select the kink residue, as shown in Figure S2.

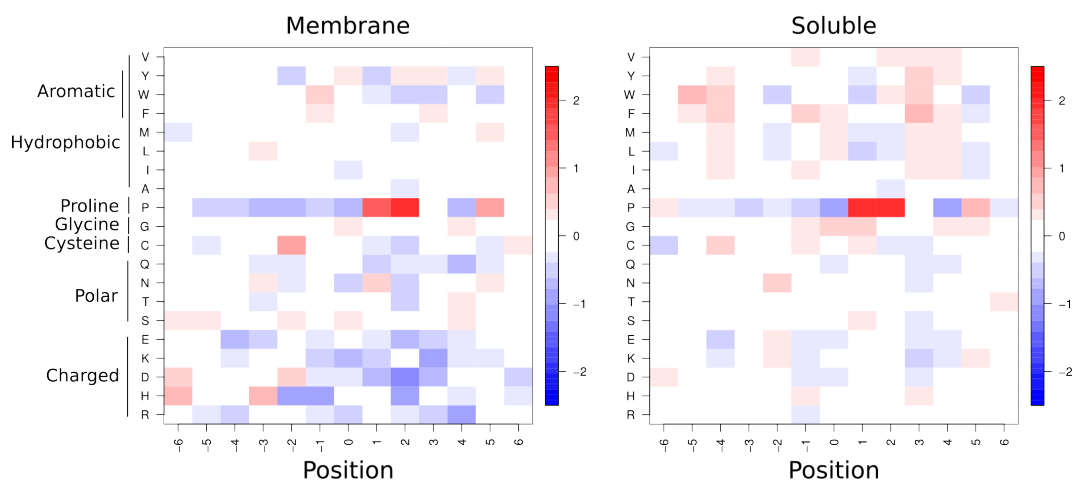

**Figure S4. Amino acid propensities for membrane (left) and soluble (right) kinks, identified by MC-Helan.** Each value is the propensity for a given residue to be at a given position relative to a kink. These are calculated using sequence profiles. Position 0 is the kink residue, position +1 is one residue towards the C-terminus from the kink residue, as shown in Figure 2. Red indicates positive propensities, while blue indicates negative propensities. Residues with positive propensities are found more frequently at that position in kinked helices than in helices in general.

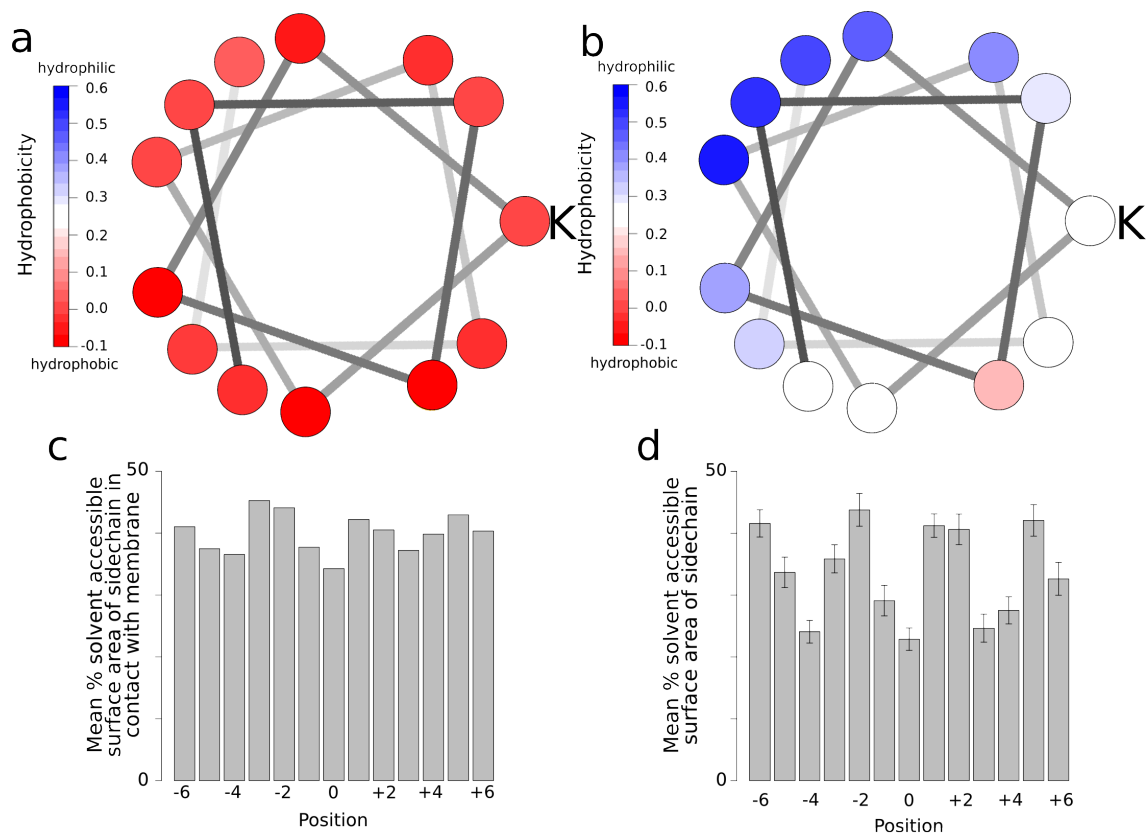

**Figure S5. Hydrophobicities, solvent accessible surface areas, and membrane contacts for kinks identified by MC-Helan.** (a) Standard helical wheel diagram showing the average hydrophobicity of residues around membrane kinks. K indicates the kink residue (position 0 in Figure 2). (b) Standard helical wheel diagram for soluble kinks. K indicates the kink residue. (c) Average percentage of residue in contact with the membrane in kinks. (d) Average solvent accessible percentage of residues in soluble kinks. Bars show 2 s.d. from 50 length-matched samples.

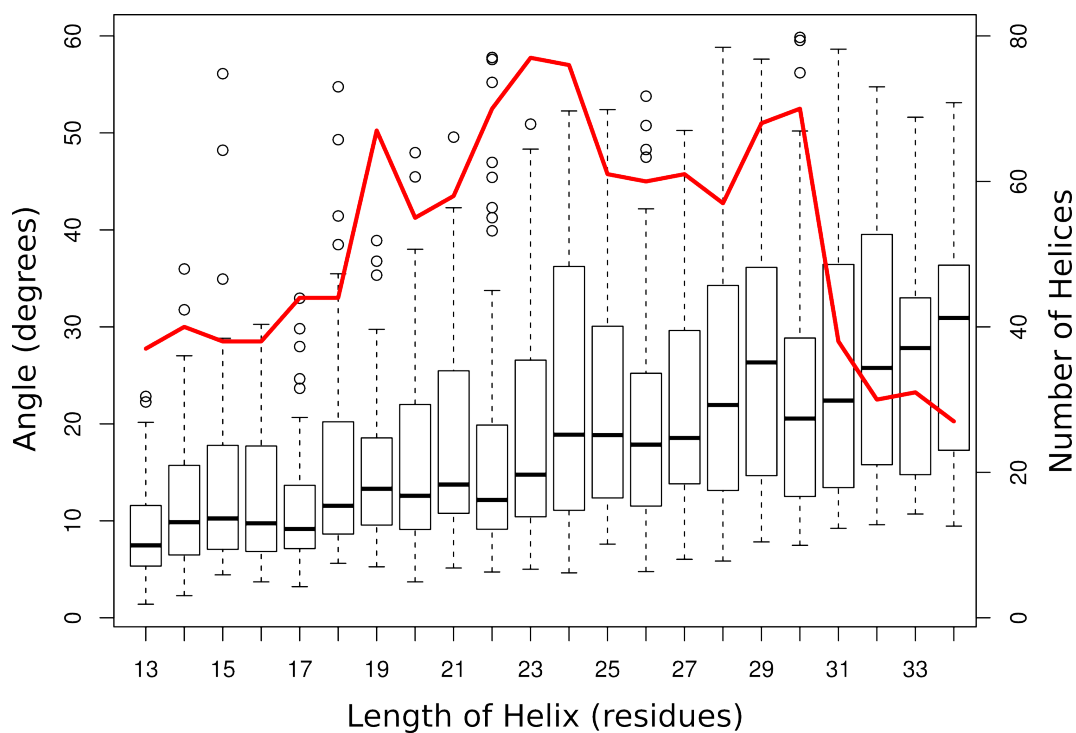

**Figure S6. Lengths and angles of membrane helices.** Plot of maximum kink angles (calculated by Kink Finder) for each different length of helices. Each boxplot shows the distribution of maximum angle in each helix of that length (scale on left axis). The red line shows the total number of helices of each length (scale on right axis). Note how the maximum angle increases as the helices get longer, and that the majority of the helices are between 20 and 30 residues long.

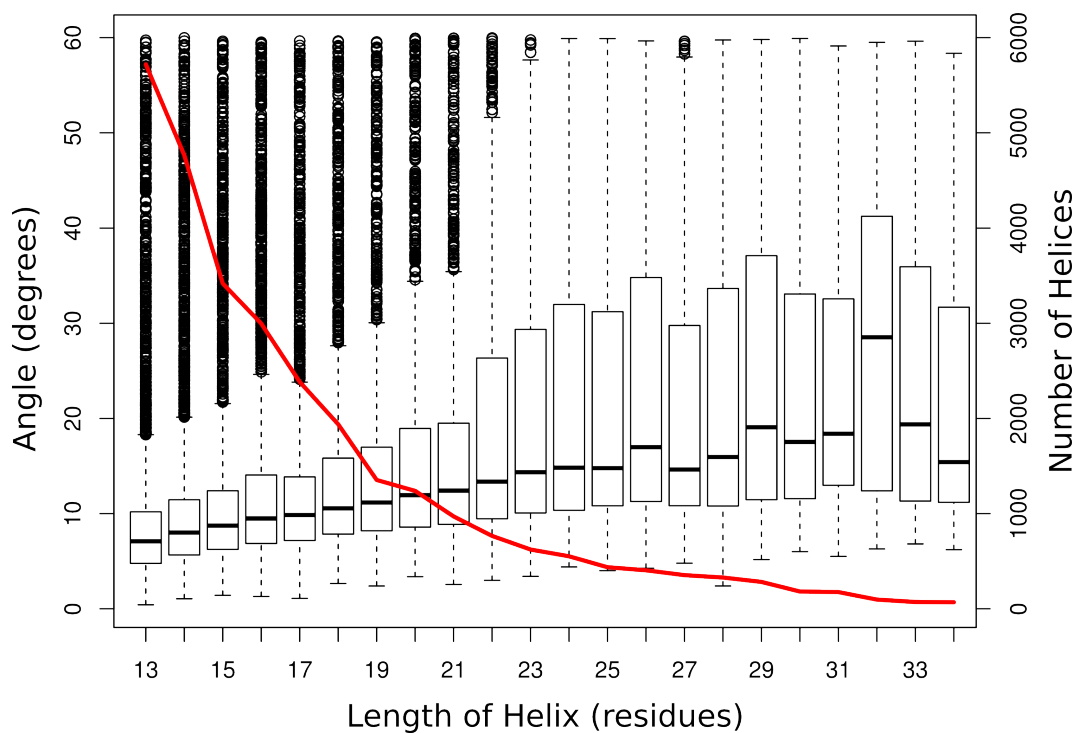

**Figure S7. Lengths and angles of soluble helices.** Plot of maximum kink angles (calculated by Kink Finder) for each different length of helices. Each boxplot shows the distribution of maximum angle in each helix of that length (scale on left axis). The red line shows the total number of helices of each length (scale on right axis). Note how the maximum angle increases as the helices get longer, and that the majority of the helices are fewer than 20 residues long.

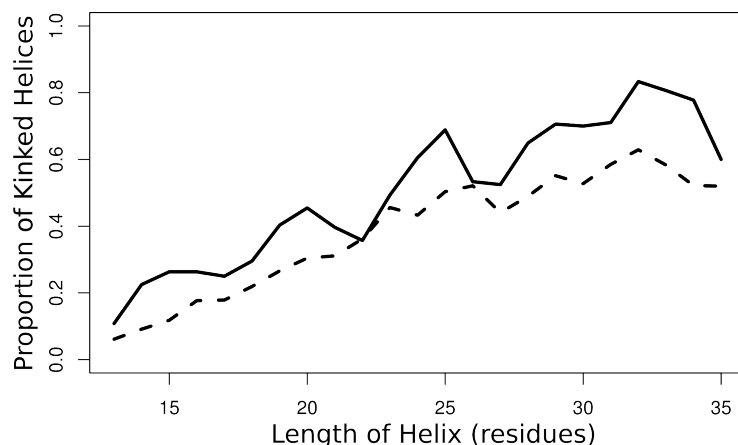

**Figure S8. Proportion of kinked helices, as determined by MC-Helan.** The proportion of helices of a given length that are kinked (with an angle over  $12^\circ$ ) is similar for membrane (solid line) and soluble (dashed line) proteins. In the same way that the maximum kink angle in each helix (as defined by Kink Finder) increases as the helix gets longer, the probability of a helix being kinked (as defined by MC-Helan) increases as the helix gets longer.

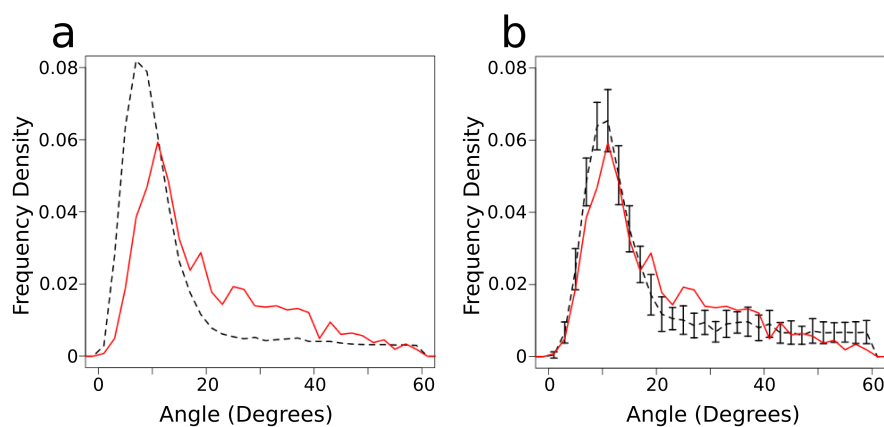

**Figure S9.** Reproduction of Figure 1, for data sets with thresholds: 80% sequence identity, resolution  $< 5\text{\AA}$ , R-factor  $< 0.9$ . (a) The distribution of maximum angles in all membrane (solid red) and all soluble (dashed black) helices. (b) The distribution of maximum angles in length matched sets of membrane and soluble helices. The soluble values are means of 50 samples which are matched to the same length distribution as the membrane helices. Again, the solid red line shows the membrane distribution, while the dashed black line shows the soluble distribution. Bars show 2 s.d. from 50 samples.



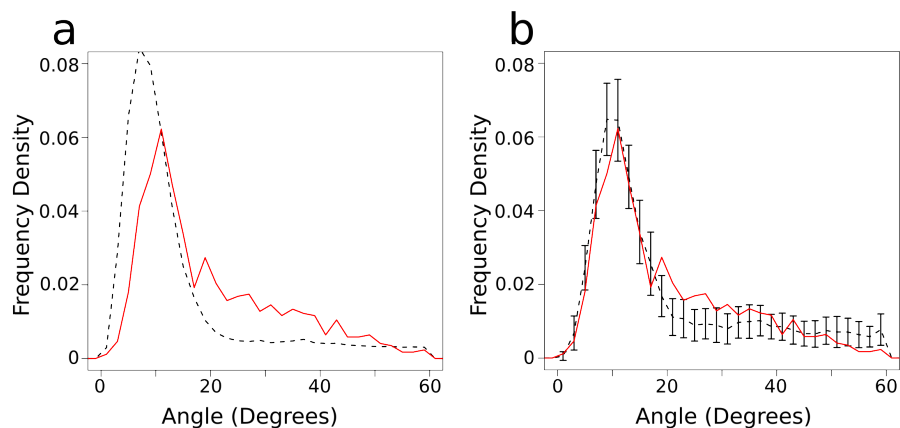

**Figure S10.** Reproduction of Figure 1, for data sets with thresholds: 80% sequence identity, resolution  $< 3\text{\AA}$ , R-factor  $< 0.9$ . (a) The distribution of maximum angles in all membrane (solid red) and all soluble (dashed black) helices. (b) The distribution of maximum angles in length matched sets of membrane and soluble helices. The soluble values are means of 50 samples which are matched to the same length distribution as the membrane helices. Again, the solid red line shows the membrane distribution, while the dashed black line shows the soluble distribution. Bars show 2 s.d. from 50 samples.

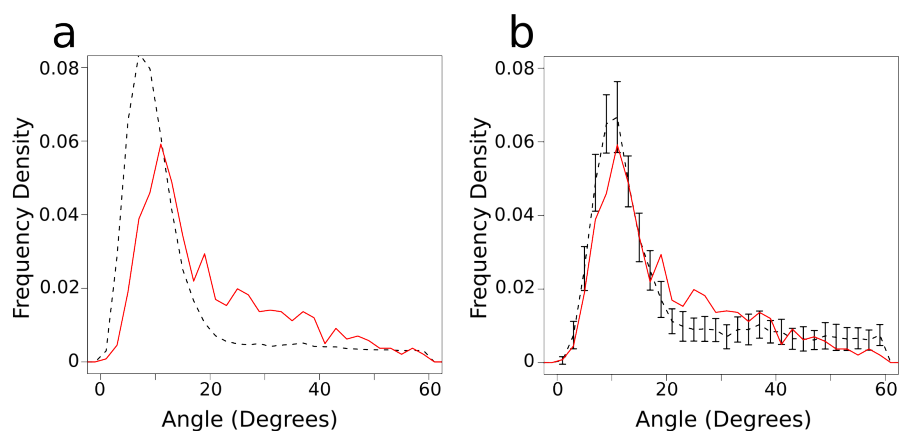

**Figure S11.** Reproduction of Figure 1, for data sets with thresholds: 50% sequence identity, resolution  $< 5\text{\AA}$ , R-factor  $< 0.9$ . (a) The distribution of maximum angles in all membrane (solid red) and all soluble (dashed black) helices. (b) The distribution of maximum angles in length matched sets of membrane and soluble helices. The soluble values are means of 50 samples which are matched to the same length distribution as the membrane helices. Again, the solid red line shows the membrane distribution, while the dashed black line shows the soluble distribution. Bars show 2 s.d. from 50 samples.

**Table S1. Amino Acid Motif Frequencies**

| Motif                                | Membrane    |                          |              | Soluble     |                          |              |
|--------------------------------------|-------------|--------------------------|--------------|-------------|--------------------------|--------------|
|                                      | %<br>Kinks  | %<br>Straight<br>Helices | Ratio        | %<br>Kinks  | %<br>Straight<br>Helices | Ratio        |
| [AVILMFYW]xxxP                       | <b>27.2</b> | 0.6                      | <b>49.3</b>  | 9.5         | 0.0                      | <b>453.4</b> |
| xxxxP                                | <b>41.9</b> | 1.0                      | <b>43.6</b>  | <b>27.7</b> | 0.1                      | <b>344.3</b> |
| [ST]P                                | 3.7         | 0.0                      | <b>81.5</b>  | 2.4         | 0.2                      | <b>12.8</b>  |
| [DR]P                                | 0.8         | 0.2                      | <b>3.4</b>   | 2.6         | 0.2                      | <b>17.4</b>  |
| xP                                   | <b>44.3</b> | 7.0                      | <b>6.4</b>   | <b>29.4</b> | 2.0                      | <b>14.9</b>  |
| xxxP                                 | <b>42.5</b> | 1.8                      | <b>23.9</b>  | <b>28.1</b> | 0.2                      | <b>172.1</b> |
| [AVILMFYW]xP                         | <b>32.1</b> | 3.1                      | <b>10.4</b>  | <b>19.1</b> | 0.4                      | <b>46.5</b>  |
| GxP                                  | 2.9         | 0.0                      | <b>128.0</b> | 0.9         | 0.0                      | <b>36.3</b>  |
| xxP                                  | <b>43.8</b> | 3.5                      | <b>12.4</b>  | <b>28.7</b> | 0.7                      | <b>38.8</b>  |
| P[ST]                                | 4.1         | 0.1                      | <b>60.1</b>  | 2.5         | 0.6                      | <b>4.5</b>   |
| Px                                   | <b>43.3</b> | 11.0                     | <b>3.9</b>   | <b>30.0</b> | 5.5                      | <b>5.5</b>   |
| P                                    | <b>45.0</b> | 11.3                     | <b>4.0</b>   | <b>30.6</b> | 5.5                      | <b>5.6</b>   |
| [VALT]LW <sub>x</sub> [AG]YP         | 0.3         | 0.0                      | NA           | 0.0         | 0.0                      | NA           |
| GHP <sub>x</sub> VY[F <sub>I</sub> ] | 0.3         | 0.0                      | NA           | 0.0         | 0.0                      | NA           |
| [ST][ST]                             | <b>12.6</b> | 9.8                      | 1.3          | 9.4         | 7.3                      | 1.3          |
| [ST]xx[ST]                           | 9.9         | 10.8                     | 0.9          | 9.1         | 7.0                      | 1.3          |
| [ST]xxx[ST]                          | 9.3         | 7.8                      | 1.2          | 8.7         | 6.8                      | 1.3          |
| G <sub>xx</sub> G <sub>xxx</sub> G   | 1.1         | 1.3                      | 0.8          | 0.1         | 0.0                      | <b>2.1</b>   |
| G <sub>xxx</sub> G <sub>xx</sub> G   | 1.1         | 0.6                      | 1.8          | 0.1         | 0.0                      | <b>5.2</b>   |
| [FYW]xxxSxxx[FYW]                    | 0.7         | 0.4                      | 1.9          | 0.3         | 0.1                      | <b>3.2</b>   |
| LSA <sub>x</sub> F                   | 0.3         | 0.3                      | 0.9          | 0.1         | 0.0                      | <b>6.0</b>   |
| WLF[ST]                              | 0.3         | 0.0                      | NA           | 0.0         | 0.0                      | NA           |
| [FYW]xxx[FYW]                        | <b>17.1</b> | 12.7                     | 1.3          | 9.0         | 5.9                      | 1.5          |
| [FYW]xxx[FYW]xx[FYW]                 | 2.9         | 0.2                      | <b>13.7</b>  | 1.1         | 0.4                      | <b>2.4</b>   |
| [FYW]xxx[FYW]xxx[FYW]                | 3.6         | 0.4                      | <b>8.0</b>   | 1.0         | 0.4                      | <b>2.7</b>   |
| [FYW]xx[FYW]xxx[FYW]                 | 2.1         | 1.1                      | 2.0          | 1.0         | 0.4                      | <b>2.6</b>   |
| [RHDEK]xxx[RHDEK]                    | 8.5         | 9.5                      | 0.9          | <b>50.6</b> | 58.5                     | 0.9          |
| [ASG]xxx[ASG]                        | <b>39.7</b> | 47.0                     | 0.8          | <b>26.3</b> | 33.3                     | 0.8          |
| [STNQ]xxx[STNQ]                      | <b>17.6</b> | 18.0                     | 1.0          | <b>25.1</b> | 24.7                     | 1.0          |
| G <sub>0</sub> or G <sub>+1</sub>    | <b>16.0</b> | 19.8                     | 0.8          | <b>10.9</b> | 6.2                      | 1.7          |

**Table of amino acid motif frequency in kinks and randomly selected parts of straight helices, using the kinks identified by MC-Helan.** Motifs that occur in more than 10% of kinks, or are more than twice as frequent in kinks than straight helices are highlighted in bold. First section: Proline containing motifs. Second section: motifs highlighted by other authors. Third section: aromatic and polar motifs. Fourth section: small residue motifs.

**Table S2. P Values for K-S Tests**

| Helix Length (residues) | p value               |
|-------------------------|-----------------------|
| 13                      | $3.9 \times 10^{-07}$ |
| 14                      | 0.0004                |
| 15                      | 0.0002                |
| 16                      | 0.003                 |
| 17                      | 0.0006                |
| 18                      | 0.317                 |
| 19                      | 0.303                 |
| 20                      | 0.174                 |
| 21                      | 0.866                 |
| 22                      | 0.018                 |
| 23                      | 0.212                 |
| 24                      | 0.757                 |
| 25                      | 0.917                 |
| 26                      | 0.329                 |
| 27                      | 0.323                 |
| 28                      | 0.084                 |
| 29                      | 0.033                 |
| 30                      | 0.246                 |
| 31                      | 0.315                 |
| 32                      | 0.113                 |
| 33                      | 0.594                 |
| 34                      | 0.335                 |
| 35                      | 0.758                 |
| 36                      | 0.667                 |
| 37                      | 0.429                 |
| 38                      | 0.016                 |
| 39                      | 0.900                 |
| 40                      | 0.800                 |

**P values for Kolmogorov-Smirnov tests on the distribution of maximum kink angles in helices of given lengths.** P values  $\leq 0.05$  indicate that the distributions of angles for soluble and membrane helices (of a given length) are different.

**Table S3. Prolines in Helices**

|                                                     | Membrane |          | Soluble length-matched |          |
|-----------------------------------------------------|----------|----------|------------------------|----------|
|                                                     | Kinked   | Straight | Kinked                 | Straight |
| Proline in helix                                    | 29.6     | 18.3     | 17.0                   | 12.2     |
| No Proline in helix                                 | 9.9      | 42.3     | 15.0                   | 55.7     |
| Proline in profile                                  | 33.9     | 27.8     | 23.2                   | 26.3     |
| No Proline in profile                               | 5.5      | 32.8     | 8.9                    | 41.6     |
| Proline in helix (5th and subsequent residues)      | 26.7     | 4.8      | 13.5                   | 0.7      |
| No Proline in helix (5th and subsequent residues)   | 12.7     | 55.8     | 18.5                   | 67.3     |
| Proline in profile (5th and subsequent residues)    | 31.1     | 10.3     | 18.9                   | 5.4      |
| No Proline in profile (5th and subsequent residues) | 8.3      | 50.2     | 13.2                   | 62.5     |

Percentage of kinked and non kinked Helices containing Proline, as identified by Kink Finder. Each 2x2 table shows the percentage of helices in each of 4 groups - kinked with Proline in the sequence (profile), kinked without Proline in the sequence (profile), straight with Proline in the sequence (profile), straight without Proline in the sequence (profile). The bottom half of the table ignores the first 4 (N-terminal) residues of helices when determining if there is a Proline in the sequence (profile), as these do not have the same effect on the helix structure as those later in the helix.

**Table S4. Hydrogen Bonds**

|          |           | Membrane       |                  |       | Soluble          |                |       |
|----------|-----------|----------------|------------------|-------|------------------|----------------|-------|
|          |           | Kinked Helices | Straight Helices | Kinks | Straight Helices | Kinked Helices | Kinks |
| Residues | missing   | 15.6%          | 12.8%            | 6.7%  | 13.5%            | 11.1%          | 5.7%  |
| backbone | hydrogen  |                |                  |       |                  |                |       |
| bond     |           |                |                  |       |                  |                |       |
| Residues | missing   | 14.6%          | 12.3%            | 6.3%  | 11.8%            | 9.7%           | 5.7%  |
| backbone | hydrogen  |                |                  |       |                  |                |       |
| bond,    | excluding |                |                  |       |                  |                |       |
| Prolines |           |                |                  |       |                  |                |       |

**Frequency of broken backbone hydrogen bonds in kinks and helices.** Each value is the percentage of residues that have no mainchain to mainchain hydrogen bond to their carbonyl group. The second row excludes kinks and helices that contain Proline residues.

Table S5. Membrane Helices

| Code | C | St. | End | Res.  | R    | Code | C | St. | End | Res.  | R    | Code | C | St. | End | Res.  | R    |
|------|---|-----|-----|-------|------|------|---|-----|-----|-------|------|------|---|-----|-----|-------|------|
| 1A91 | A | 2   | 38  | NA    | NA   | 1A91 | A | 47  | 78  | NA    | NA   | 1AIG | L | 33  | 56  | 2.600 | 0.21 |
| 1AIG | L | 84  | 111 | 2.600 | 0.21 | 1AIG | L | 116 | 139 | 2.600 | 0.21 | 1AIG | L | 171 | 198 | 2.600 | 0.21 |
| 1AIG | L | 227 | 249 | 2.600 | 0.21 | 1AR1 | B | 26  | 58  | 2.700 | 0.21 | 1AR1 | B | 76  | 104 | 2.700 | 0.21 |
| 1BCC | D | 199 | 227 | 3.160 | 0.27 | 1BCC | E | 30  | 58  | 3.160 | 0.27 | 1BE3 | C | 34  | 51  | 3.000 | 0.26 |
| 1BE3 | C | 137 | 149 | 3.000 | 0.26 | 1BE3 | C | 172 | 200 | 3.000 | 0.26 | 1BE3 | C | 225 | 242 | 3.000 | 0.26 |
| 1BE3 | C | 287 | 307 | 3.000 | 0.26 | 1BE3 | C | 319 | 339 | 3.000 | 0.26 | 1BE3 | C | 345 | 376 | 3.000 | 0.26 |
| 1BE3 | C | 76  | 102 | 3.000 | 0.26 | 1BE3 | C | 110 | 130 | 3.000 | 0.26 | 1BE3 | G | 36  | 70  | 3.000 | 0.26 |
| 1BE3 | J | 18  | 46  | 3.000 | 0.26 | 1C17 | M | 101 | 125 | NA    | NA   | 1C17 | M | 137 | 166 | NA    | NA   |
| 1C17 | M | 202 | 228 | NA    | NA   | 1C17 | M | 235 | 263 | NA    | NA   | 1C8S | A | 10  | 31  | 2.000 | 0.17 |
| 1C8S | A | 38  | 61  | 2.000 | 0.17 | 1C8S | A | 82  | 100 | 2.000 | 0.17 | 1C8S | A | 202 | 221 | 2.000 | 0.17 |
| 1C8S | A | 177 | 191 | 2.000 | 0.17 | 1C8S | A | 106 | 127 | 2.000 | 0.17 | 1C8S | A | 133 | 151 | 2.000 | 0.17 |
| 1DXR | H | 12  | 35  | 2.000 | 0.19 | 1DXR | L | 33  | 54  | 2.000 | 0.19 | 1DXR | L | 84  | 111 | 2.000 | 0.19 |
| 1DXR | L | 116 | 139 | 2.000 | 0.19 | 1DXR | L | 171 | 198 | 2.000 | 0.19 | 1DXR | L | 228 | 250 | 2.000 | 0.19 |
| 1DXR | M | 53  | 76  | 2.000 | 0.19 | 1DXR | M | 111 | 137 | 2.000 | 0.19 | 1DXR | M | 143 | 166 | 2.000 | 0.19 |
| 1DXR | M | 262 | 284 | 2.000 | 0.19 | 1DXR | M | 198 | 225 | 2.000 | 0.19 | 1DXR | M | 241 | 253 | 2.000 | 0.19 |
| 1E7P | C | 76  | 97  | 3.100 | 0.28 | 1E7P | C | 202 | 236 | 3.100 | 0.28 | 1E7P | C | 22  | 46  | 3.100 | 0.28 |
| 1E7P | C | 121 | 149 | 3.100 | 0.28 | 1E7P | C | 171 | 193 | 3.100 | 0.28 | 1EHK | B | 6   | 38  | 2.400 | 0.22 |
| 1EK9 | A | 23  | 36  | 2.100 | 0.21 | 1EK9 | A | 78  | 93  | 2.100 | 0.21 | 1EK9 | A | 229 | 242 | 2.100 | 0.21 |
| 1EYS | H | 11  | 33  | 2.200 | 0.23 | 1EYS | L | 33  | 55  | 2.200 | 0.23 | 1EYS | L | 92  | 117 | 2.200 | 0.23 |
| 1EYS | L | 124 | 147 | 2.200 | 0.23 | 1EYS | L | 234 | 254 | 2.200 | 0.23 | 1EYS | L | 179 | 205 | 2.200 | 0.23 |
| 1EYS | M | 55  | 76  | 2.200 | 0.23 | 1EYS | M | 112 | 137 | 2.200 | 0.23 | 1EYS | M | 144 | 167 | 2.200 | 0.23 |
| 1EYS | M | 263 | 283 | 2.200 | 0.23 | 1EYS | M | 199 | 224 | 2.200 | 0.23 | 1EZV | C | 32  | 51  | 2.300 | 0.22 |
| 1EZV | C | 75  | 102 | 2.300 | 0.22 | 1EZV | C | 173 | 202 | 2.300 | 0.22 | 1EZV | C | 226 | 244 | 2.300 | 0.22 |
| 1EZV | C | 288 | 308 | 2.300 | 0.22 | 1EZV | C | 320 | 340 | 2.300 | 0.22 | 1EZV | C | 348 | 379 | 2.300 | 0.22 |
| 1EZV | C | 111 | 134 | 2.300 | 0.22 | 1EZV | C | 138 | 150 | 2.300 | 0.22 | 1EZV | E | 51  | 79  | 2.300 | 0.22 |
| 1EZV | C | 61  | 81  | 2.300 | 0.22 | 1F88 | B | 34  | 63  | 2.800 | 0.19 | 1F88 | B | 71  | 98  | 2.800 | 0.19 |
| 1F88 | B | 108 | 137 | 2.800 | 0.19 | 1F88 | B | 153 | 166 | 2.800 | 0.19 | 1F88 | B | 201 | 223 | 2.800 | 0.19 |
| 1F88 | B | 247 | 276 | 2.800 | 0.19 | 1F88 | B | 291 | 308 | 2.800 | 0.19 | 1FX8 | A | 7   | 33  | 2.200 | 0.20 |
| 1FX8 | A | 41  | 59  | 2.200 | 0.20 | 1FX8 | A | 145 | 167 | 2.200 | 0.20 | 1FX8 | A | 178 | 193 | 2.200 | 0.20 |
| 1FX8 | A | 204 | 216 | 2.200 | 0.20 | 1FX8 | A | 234 | 253 | 2.200 | 0.20 | 1FX8 | A | 85  | 105 | 2.200 | 0.20 |
| 1H2S | B | 24  | 49  | 1.930 | 0.23 | 1H2S | B | 53  | 81  | 1.930 | 0.23 | 1IJD | A | 15  | 35  | 3.000 | 0.24 |
| 1IJD | B | 8   | 33  | 3.000 | 0.24 | 1J4N | A | 6   | 34  | 2.200 | 0.27 | 1J4N | A | 51  | 69  | 2.200 | 0.27 |
| 1J4N | A | 94  | 115 | 2.200 | 0.27 | 1J4N | A | 141 | 158 | 2.200 | 0.27 | 1J4N | A | 170 | 184 | 2.200 | 0.27 |
| 1J4N | A | 217 | 229 | 2.200 | 0.27 | 1JB0 | J | 13  | 32  | 2.500 | 0.20 | 1JB0 | L | 43  | 64  | 2.500 | 0.20 |
| 1JB0 | L | 74  | 99  | 2.500 | 0.20 | 1JB0 | L | 114 | 138 | 2.500 | 0.20 | 1KF6 | C | 106 | 128 | 2.700 | 0.23 |
| 1KF6 | C | 20  | 49  | 2.700 | 0.23 | 1KF6 | C | 67  | 89  | 2.700 | 0.23 | 1KF6 | D | 12  | 41  | 2.700 | 0.23 |
| 1KF6 | D | 99  | 115 | 2.700 | 0.23 | 1KF6 | D | 61  | 88  | 2.700 | 0.23 | 1KPL | B | 33  | 65  | 3.000 | 0.26 |
| 1KPL | B | 78  | 99  | 3.000 | 0.26 | 1KPL | B | 128 | 141 | 3.000 | 0.26 | 1KPL | B | 152 | 165 | 3.000 | 0.26 |
| 1KPL | B | 215 | 232 | 3.000 | 0.26 | 1KPL | B | 330 | 348 | 3.000 | 0.26 | 1KPL | B | 444 | 456 | 3.000 | 0.26 |
| 1KPL | B | 171 | 187 | 3.000 | 0.26 | 1KPL | B | 253 | 283 | 3.000 | 0.26 | 1KPL | B | 288 | 305 | 3.000 | 0.26 |
| 1KPL | B | 357 | 377 | 3.000 | 0.26 | 1KPL | B | 421 | 438 | 3.000 | 0.26 | 1KQF | B | 248 | 277 | 1.600 | 0.18 |
| 1KQF | C | 12  | 36  | 1.600 | 0.18 | 1KQF | C | 50  | 75  | 1.600 | 0.18 | 1KQF | C | 111 | 133 | 1.600 | 0.18 |
| 1KQF | C | 145 | 174 | 1.600 | 0.18 | 1KZU | B | 5   | 35  | 2.500 | 0.23 | 1L7V | A | 3   | 32  | 3.200 | 0.26 |
| 1L7V | A | 56  | 81  | 3.200 | 0.26 | 1L7V | A | 93  | 106 | 3.200 | 0.26 | 1L7V | A | 228 | 250 | 3.200 | 0.26 |
| 1L7V | A | 276 | 295 | 3.200 | 0.26 | 1L7V | A | 305 | 323 | 3.200 | 0.26 | 1L7V | A | 114 | 138 | 3.200 | 0.26 |
| 1L7V | A | 142 | 167 | 3.200 | 0.26 | 1L7V | A | 190 | 213 | 3.200 | 0.26 | 1LGH | A | 19  | 38  | 2.400 | 0.21 |
| 1LGH | B | 10  | 41  | 2.400 | 0.21 | 1M56 | A | 26  | 55  | 2.300 | 0.24 | 1M56 | A | 92  | 115 | 2.300 | 0.24 |
| 1M56 | A | 136 | 154 | 2.300 | 0.24 | 1M56 | A | 186 | 213 | 2.300 | 0.24 | 1M56 | A | 227 | 257 | 2.300 | 0.24 |
| 1M56 | A | 273 | 305 | 2.300 | 0.24 | 1M56 | A | 313 | 326 | 2.300 | 0.24 | 1M56 | A | 342 | 370 | 2.300 | 0.24 |
| 1M56 | A | 450 | 476 | 2.300 | 0.24 | 1M56 | A | 491 | 520 | 2.300 | 0.24 | 1M56 | A | 381 | 400 | 2.300 | 0.24 |
| 1M56 | A | 414 | 444 | 2.300 | 0.24 | 1M56 | B | 49  | 82  | 2.300 | 0.24 | 1M56 | B | 98  | 127 | 2.300 | 0.24 |
| 1M56 | C | 17  | 36  | 2.300 | 0.24 | 1M56 | C | 42  | 67  | 2.300 | 0.24 | 1M56 | C | 73  | 106 | 2.300 | 0.24 |
| 1M56 | C | 197 | 228 | 2.300 | 0.24 | 1M56 | C | 238 | 259 | 2.300 | 0.24 | 1M56 | C | 134 | 155 | 2.300 | 0.24 |
| 1M56 | C | 161 | 187 | 2.300 | 0.24 | 1M56 | D | 19  | 49  | 2.300 | 0.24 | 1MM4 | A | 7   | 19  | NA    | NA   |
| 1N7L | A | 25  | 50  | NA    | NA   | 1NEK | C | 103 | 128 | 2.600 | 0.25 | 1NEK | C | 22  | 51  | 2.600 | 0.25 |
| 1NEK | C | 69  | 96  | 2.600 | 0.25 | 1NKZ | A | 15  | 35  | 2.000 | 0.17 | 1OCC | A | 12  | 41  | 2.800 | 0.20 |
| 1OCC | A | 52  | 87  | 2.800 | 0.20 | 1OCC | A | 95  | 115 | 2.800 | 0.20 | 1OCC | A | 142 | 169 | 2.800 | 0.20 |
| 1OCC | A | 184 | 212 | 2.800 | 0.20 | 1OCC | A | 229 | 261 | 2.800 | 0.20 | 1OCC | A | 270 | 283 | 2.800 | 0.20 |
| 1OCC | A | 299 | 327 | 2.800 | 0.20 | 1OCC | A | 407 | 433 | 2.800 | 0.20 | 1OCC | A | 448 | 477 | 2.800 | 0.20 |
| 1OCC | A | 336 | 359 | 2.800 | 0.20 | 1OCC | A | 372 | 401 | 2.800 | 0.20 | 1OCC | B | 15  | 45  | 2.800 | 0.20 |
| 1OCC | B | 61  | 87  | 2.800 | 0.20 | 1OCC | C | 73  | 105 | 2.800 | 0.20 | 1OCC | C | 193 | 223 | 2.800 | 0.20 |
| 1OCC | C | 234 | 254 | 2.800 | 0.20 | 1OCC | C | 16  | 34  | 2.800 | 0.20 | 1OCC | C | 40  | 65  | 2.800 | 0.20 |
| 1OCC | C | 129 | 152 | 2.800 | 0.20 | 1OCC | C | 156 | 183 | 2.800 | 0.20 | 1OCC | D | 77  | 102 | 2.800 | 0.20 |
| 1OCC | G | 13  | 37  | 2.800 | 0.20 | 1OCC | I | 12  | 52  | 2.800 | 0.20 | 1OCC | K | 13  | 34  | 2.800 | 0.20 |
| 1OCC | L | 18  | 44  | 2.800 | 0.20 | 1OCC | M | 12  | 41  | 2.800 | 0.20 | 1OCR | J | 26  | 54  | 2.350 | 0.20 |
| 1ORQ | C | 29  | 50  | 3.200 | 0.25 | 1ORQ | C | 60  | 78  | 3.200 | 0.25 | 1ORQ | C | 147 | 170 | 3.200 | 0.25 |
| 1ORQ | C | 207 | 236 | 3.200 | 0.25 | 1PV6 | A | 7   | 35  | 3.500 | 0.29 | 1PV6 | A | 43  | 70  | 3.500 | 0.29 |
| 1PV6 | A | 168 | 185 | 3.500 | 0.29 | 1PV6 | A | 221 | 247 | 3.500 | 0.29 | 1PV6 | A | 254 | 284 | 3.500 | 0.29 |
| 1PV6 | A | 290 | 306 | 3.500 | 0.29 | 1PV6 | A | 312 | 338 | 3.500 | 0.29 | 1PV6 | A | 142 | 157 | 3.500 | 0.29 |
| 1PV6 | A | 345 | 374 | 3.500 | 0.29 | 1PV6 | A | 378 | 398 | 3.500 | 0.29 | 1PW4 | A | 20  | 52  | 3.300 | 0.30 |

**Helices in membrane set.** Code = PDB Code; C = Chain identifier; St. = Number of first residue in helix; End = Number of last residue in helix; Res. = Resolution (Angstroms); R = R-Factor. NAs in the last two columns indicate the protein structure was solved by a method other than X-ray diffraction.

Table S5 continued. Membrane Helices

| Code | C | St.  | End  | Res.  | R    | Code | C | St.  | End  | Res.  | R    | Code | C | St.  | End  | Res.  | R    |
|------|---|------|------|-------|------|------|---|------|------|-------|------|------|---|------|------|-------|------|
| 1PW4 | A | 122  | 146  | 3.300 | 0.30 | 1PW4 | A | 154  | 178  | 3.300 | 0.30 | 1PW4 | A | 191  | 206  | 3.300 | 0.30 |
| 1PW4 | A | 253  | 276  | 3.300 | 0.30 | 1PW4 | A | 290  | 315  | 3.300 | 0.30 | 1PW4 | A | 321  | 338  | 3.300 | 0.30 |
| 1PW4 | A | 351  | 372  | 3.300 | 0.30 | 1PW4 | A | 382  | 408  | 3.300 | 0.30 | 1PW4 | A | 415  | 443  | 3.300 | 0.30 |
| 1PW4 | A | 65   | 78   | 3.300 | 0.30 | 1PW4 | A | 95   | 109  | 3.300 | 0.30 | 1Q90 | A | 249  | 280  | 3.100 | 0.22 |
| 1QLE | C | 17   | 34   | 3.000 | 0.23 | 1QLE | C | 54   | 74   | 3.000 | 0.23 | 1QLE | C | 80   | 113  | 3.000 | 0.23 |
| 1QLE | C | 206  | 232  | 3.000 | 0.23 | 1QLE | C | 247  | 266  | 3.000 | 0.23 | 1QLE | C | 141  | 163  | 3.000 | 0.23 |
| 1QLE | C | 169  | 194  | 3.000 | 0.23 | 1QLE | D | 17   | 46   | 3.000 | 0.23 | 1RC2 | A | 2    | 24   | 2.500 | 0.23 |
| 1RC2 | A | 36   | 53   | 2.500 | 0.23 | 1RC2 | A | 81   | 103  | 2.500 | 0.23 | 1RC2 | A | 131  | 151  | 2.500 | 0.23 |
| 1RC2 | A | 162  | 176  | 2.500 | 0.23 | 1RC2 | A | 200  | 224  | 2.500 | 0.23 | 1RH5 | C | 30   | 47   | 3.200 | 0.24 |
| 1RHZ | A | 23   | 40   | 3.500 | 0.25 | 1RHZ | A | 76   | 88   | 3.500 | 0.25 | 1RHZ | A | 104  | 127  | 3.500 | 0.25 |
| 1RHZ | A | 137  | 163  | 3.500 | 0.25 | 1RHZ | A | 170  | 183  | 3.500 | 0.25 | 1RHZ | A | 210  | 228  | 3.500 | 0.25 |
| 1RHZ | A | 256  | 275  | 3.500 | 0.25 | 1RHZ | A | 313  | 332  | 3.500 | 0.25 | 1RHZ | A | 367  | 394  | 3.500 | 0.25 |
| 1RHZ | A | 401  | 422  | 3.500 | 0.25 | 1RHZ | B | 3    | 21   | 3.500 | 0.25 | 1RHZ | B | 31   | 64   | 3.500 | 0.25 |
| 1S5L | x | 2015 | 2043 | 3.500 | 0.30 | 1SQQ | K | 8    | 35   | 3.000 | 0.23 | 1UYN | X | 788  | 810  | 2.600 | 0.23 |
| 1VF5 | D | 23   | 42   | 3.000 | 0.26 | 1VRY | A | 2    | 14   | NA    | NA   | 1VRY | A | 34   | 51   | NA    | NA   |
| 1WP1 | A | 66   | 82   | 2.560 | 0.26 | 1WP1 | A | 131  | 147  | 2.560 | 0.26 | 1WP1 | A | 278  | 294  | 2.560 | 0.26 |
| 1WP1 | A | 339  | 355  | 2.560 | 0.26 | 1WRG | A | 12   | 41   | NA    | NA   | 1XIO | A | 3    | 26   | 2.000 | 0.23 |
| 1XIO | A | 34   | 56   | 2.000 | 0.23 | 1XIO | A | 71   | 91   | 2.000 | 0.23 | 1XIO | A | 159  | 185  | 2.000 | 0.23 |
| 1XIO | A | 195  | 223  | 2.000 | 0.23 | 1XIO | A | 99   | 121  | 2.000 | 0.23 | 1XIO | A | 125  | 153  | 2.000 | 0.23 |
| 1XL6 | A | 47   | 69   | 2.850 | 0.27 | 1XL6 | A | 108  | 135  | 2.850 | 0.27 | 1XME | A | 11   | 45   | 2.300 | 0.22 |
| 1XME | A | 65   | 97   | 2.300 | 0.22 | 1XME | A | 105  | 125  | 2.300 | 0.22 | 1XME | A | 143  | 172  | 2.300 | 0.22 |
| 1XME | A | 181  | 212  | 2.300 | 0.22 | 1XME | A | 221  | 255  | 2.300 | 0.22 | 1XME | A | 262  | 274  | 2.300 | 0.22 |
| 1XME | A | 292  | 326  | 2.300 | 0.22 | 1XME | A | 347  | 368  | 2.300 | 0.22 | 1XME | A | 380  | 408  | 2.300 | 0.22 |
| 1XME | A | 415  | 444  | 2.300 | 0.22 | 1XME | A | 463  | 492  | 2.300 | 0.22 | 1XME | A | 527  | 551  | 2.300 | 0.22 |
| 1XRJ | A | 10   | 41   | NA    | NA   | 1YCE | a | 3    | 44   | 2.400 | 0.20 | 1YCE | a | 50   | 79   | 2.400 | 0.20 |
| 1YEW | A | 185  | 207  | 2.800 | 0.27 | 1YEW | A | 232  | 256  | 2.800 | 0.27 | 1YEW | B | 14   | 43   | 2.800 | 0.27 |
| 1YEW | B | 64   | 79   | 2.800 | 0.27 | 1YEW | B | 90   | 104  | 2.800 | 0.27 | 1YEW | B | 141  | 164  | 2.800 | 0.27 |
| 1YGM | A | 33   | 54   | NA    | NA   | 1YQ3 | D | 5    | 29   | 2.200 | 0.17 | 1YQ3 | D | 33   | 58   | 2.200 | 0.17 |
| 1YQ3 | D | 62   | 86   | 2.200 | 0.17 | 1YST | H | 12   | 34   | 3.000 | 0.23 | 1Z98 | A | 34   | 63   | 2.100 | 0.18 |
| 1Z98 | A | 74   | 92   | 2.100 | 0.18 | 1Z98 | A | 161  | 181  | 2.100 | 0.18 | 1Z98 | A | 199  | 213  | 2.100 | 0.18 |
| 1Z98 | A | 116  | 139  | 2.100 | 0.18 | 1Z98 | A | 236  | 262  | 2.100 | 0.18 | 1ZCD | A | 13   | 29   | 3.450 | 0.30 |
| 1ZCD | A | 59   | 83   | 3.450 | 0.30 | 1ZCD | A | 156  | 174  | 3.450 | 0.30 | 1ZCD | A | 181  | 199  | 3.450 | 0.30 |
| 1ZCD | A | 223  | 236  | 3.450 | 0.30 | 1ZCD | A | 247  | 271  | 3.450 | 0.30 | 1ZCD | A | 358  | 370  | 3.450 | 0.30 |
| 1ZOY | D | 98   | 121  | 2.400 | 0.23 | 1ZOY | D | 38   | 62   | 2.400 | 0.23 | 1ZOY | D | 66   | 91   | 2.400 | 0.23 |
| 1ZRT | D | 221  | 249  | 3.500 | 0.30 | 1ZZA | A | 13   | 34   | NA    | NA   | 1ZZA | A | 64   | 81   | NA    | NA   |
| 2AXT | a | 5036 | 5053 | 3.000 | 0.23 | 2AXT | a | 5143 | 5165 | 3.000 | 0.23 | 2AXT | a | 5269 | 5294 | 3.000 | 0.23 |
| 2AXT | a | 5111 | 5136 | 3.000 | 0.23 | 2AXT | a | 5196 | 5221 | 3.000 | 0.23 | 2AXT | z | 5003 | 5028 | 3.000 | 0.23 |
| 2AXT | z | 5037 | 5061 | 3.000 | 0.23 | 2B2F | A | 3    | 27   | 1.720 | 0.18 | 2B2F | A | 85   | 104  | 1.720 | 0.18 |
| 2B2F | A | 187  | 208  | 1.720 | 0.18 | 2B2F | A | 214  | 241  | 1.720 | 0.18 | 2B2F | A | 246  | 260  | 1.720 | 0.18 |
| 2B2F | A | 269  | 292  | 1.720 | 0.18 | 2B2F | A | 336  | 366  | 1.720 | 0.18 | 2B2F | A | 35   | 53   | 1.720 | 0.18 |
| 2B2F | A | 114  | 136  | 1.720 | 0.18 | 2B6P | A | 10   | 31   | 2.400 | 0.24 | 2B6P | A | 39   | 59   | 2.400 | 0.24 |
| 2B6P | A | 83   | 107  | 2.400 | 0.24 | 2B6P | A | 127  | 148  | 2.400 | 0.24 | 2B6P | A | 160  | 174  | 2.400 | 0.24 |
| 2BG9 | A | 406  | 432  | 4.000 | NA   | 2BG9 | A | 219  | 237  | 4.000 | NA   | 2BG9 | A | 247  | 266  | 4.000 | NA   |
| 2BG9 | B | 223  | 239  | 4.000 | NA   | 2BG9 | B | 250  | 274  | 4.000 | NA   | 2BG9 | B | 288  | 301  | 4.000 | NA   |
| 2BG9 | B | 433  | 465  | 4.000 | NA   | 2BG9 | C | 291  | 314  | 4.000 | NA   | 2BG9 | C | 453  | 477  | 4.000 | NA   |
| 2BG9 | C | 233  | 250  | 4.000 | NA   | 2BG9 | C | 257  | 280  | 4.000 | NA   | 2BG9 | E | 285  | 305  | 4.000 | NA   |
| 2BG9 | E | 454  | 471  | 4.000 | NA   | 2BG9 | E | 222  | 236  | 4.000 | NA   | 2BG9 | E | 253  | 277  | 4.000 | NA   |
| 2BHW | A | 55   | 86   | 2.500 | 0.22 | 2BHW | A | 124  | 143  | 2.500 | 0.22 | 2BHW | A | 170  | 200  | 2.500 | 0.22 |
| 2BL2 | A | 12   | 45   | 2.100 | 0.19 | 2BL2 | A | 52   | 78   | 2.100 | 0.19 | 2BL2 | A | 86   | 122  | 2.100 | 0.19 |
| 2BL2 | A | 128  | 155  | 2.100 | 0.19 | 2C3E | A | 8    | 37   | 2.800 | 0.25 | 2C3E | A | 210  | 238  | 2.800 | 0.25 |
| 2C3E | A | 275  | 290  | 2.800 | 0.25 | 2C3E | A | 74   | 98   | 2.800 | 0.25 | 2C3E | A | 108  | 126  | 2.800 | 0.25 |
| 2C3E | A | 169  | 200  | 2.800 | 0.25 | 2E74 | A | 35   | 55   | 3.000 | 0.23 | 2E74 | A | 79   | 105  | 3.000 | 0.23 |
| 2E74 | A | 114  | 135  | 3.000 | 0.23 | 2E74 | A | 177  | 209  | 3.000 | 0.23 | 2E74 | B | 39   | 57   | 3.000 | 0.23 |
| 2E74 | B | 94   | 116  | 3.000 | 0.23 | 2E74 | B | 127  | 145  | 3.000 | 0.23 | 2EVU | A | 4    | 33   | 2.300 | 0.19 |
| 2EVU | A | 52   | 72   | 2.300 | 0.19 | 2EVU | A | 99   | 122  | 2.300 | 0.19 | 2EVU | A | 143  | 164  | 2.300 | 0.19 |
| 2EVU | A | 176  | 188  | 2.300 | 0.19 | 2EVU | A | 200  | 212  | 2.300 | 0.19 | 2EVU | A | 227  | 243  | 2.300 | 0.19 |
| 2EZO | A | 33   | 63   | 3.540 | 0.26 | 2EZO | A | 75   | 97   | 3.540 | 0.26 | 2EZO | A | 152  | 165  | 3.540 | 0.26 |
| 2EZO | A | 215  | 231  | 3.540 | 0.26 | 2EZO | A | 253  | 282  | 3.540 | 0.26 | 2EZO | A | 290  | 305  | 3.540 | 0.26 |
| 2EZO | A | 330  | 348  | 3.540 | 0.26 | 2EZO | A | 359  | 378  | 3.540 | 0.26 | 2EZO | A | 387  | 399  | 3.540 | 0.26 |
| 2EZO | A | 421  | 434  | 3.540 | 0.26 | 2EZO | A | 171  | 189  | 3.540 | 0.26 | 2FBW | C | 34   | 62   | 2.100 | 0.19 |
| 2FBW | C | 81   | 109  | 2.100 | 0.19 | 2FBW | C | 116  | 138  | 2.100 | 0.19 | 2FYN | A | 46   | 66   | 3.200 | 0.22 |
| 2FYN | A | 91   | 118  | 3.200 | 0.22 | 2FYN | A | 126  | 148  | 3.200 | 0.22 | 2FYN | A | 189  | 217  | 3.200 | 0.22 |
| 2FYN | A | 328  | 345  | 3.200 | 0.22 | 2FYN | A | 363  | 381  | 3.200 | 0.22 | 2FYN | A | 390  | 412  | 3.200 | 0.22 |
| 2FYN | A | 251  | 269  | 3.200 | 0.22 | 2FYN | B | 222  | 251  | 3.200 | 0.22 | 2FYN | C | 12   | 36   | 3.200 | 0.22 |
| 2GFP | A | 10   | 33   | 3.500 | 0.28 | 2GFP | A | 43   | 56   | 3.500 | 0.28 | 2GFP | A | 208  | 226  | 3.500 | 0.28 |
| 2GFP | A | 242  | 257  | 3.500 | 0.28 | 2GFP | A | 270  | 282  | 3.500 | 0.28 | 2GFP | A | 294  | 312  | 3.500 | 0.28 |
| 2GFP | A | 321  | 343  | 3.500 | 0.28 | 2GFP | A | 357  | 377  | 3.500 | 0.28 | 2GFP | A | 100  | 126  | 3.500 | 0.28 |
| 2GFP | A | 134  | 150  | 3.500 | 0.28 | 2GFP | A | 160  | 175  | 3.500 | 0.28 | 2HYD | A | 278  | 317  | 3.000 | 0.26 |
| 2HYD | A | 12   | 41   | 3.000 | 0.26 | 2HYD | A | 52   | 106  | 3.000 | 0.26 | 2HYD | A | 111  | 159  | 3.000 | 0.26 |
| 2HYD | A | 164  | 209  | 3.000 | 0.26 | 2HYD | A | 218  | 272  | 3.000 | 0.26 | 2IC8 | A | 201  | 217  | 2.100 | 0.24 |

**Helices in membrane set.** Code = PDB Code; C = Chain identifier; St. = Number of first residue in helix; End = Number of last residue in helix; Res. = Resolution (Angstroms); R = R-Factor. NAs in the last two columns indicate the protein structure was solved by a method other than X-ray diffraction.

Table S5 continued. Membrane Helices

| Code | C | St. | End | Res.  | R    | Code | C | St. | End | Res.  | R    | Code | C | St. | End | Res.  | R    |
|------|---|-----|-----|-------|------|------|---|-----|-----|-------|------|------|---|-----|-----|-------|------|
| 2IC8 | A | 229 | 241 | 2.100 | 0.24 | 2IC8 | A | 251 | 268 | 2.100 | 0.24 | 2IC8 | A | 95  | 112 | 2.100 | 0.24 |
| 2IC8 | A | 152 | 167 | 2.100 | 0.24 | 2IC8 | A | 171 | 192 | 2.100 | 0.24 | 2IUB | F | 278 | 307 | 2.900 | 0.26 |
| 2IUB | F | 328 | 342 | 2.900 | 0.26 | 2JAF | A | 28  | 50  | 1.700 | 0.24 | 2JAF | A | 58  | 81  | 1.700 | 0.24 |
| 2JAF | A | 106 | 125 | 1.700 | 0.24 | 2JAF | A | 131 | 153 | 1.700 | 0.24 | 2JAF | A | 158 | 188 | 1.700 | 0.24 |
| 2JAF | A | 193 | 216 | 1.700 | 0.24 | 2JAF | A | 227 | 252 | 1.700 | 0.24 | 2K37 | A | 5   | 26  | NA    | NA   |
| 2K73 | A | 42  | 61  | NA    | NA   | 2K73 | A | 69  | 96  | NA    | NA   | 2K73 | A | 142 | 162 | NA    | NA   |
| 2K73 | A | 12  | 35  | NA    | NA   | 2K9P | A | 39  | 72  | NA    | NA   | 2K9P | A | 80  | 103 | NA    | NA   |
| 2K9Y | A | 537 | 553 | NA    | NA   | 2KNC | B | 701 | 739 | NA    | NA   | 2KS1 | B | 148 | 169 | NA    | NA   |
| 2KS9 | A | 29  | 58  | NA    | NA   | 2KS9 | A | 66  | 95  | NA    | NA   | 2KS9 | A | 102 | 135 | NA    | NA   |
| 2KS9 | A | 144 | 162 | NA    | NA   | 2KS9 | A | 193 | 220 | NA    | NA   | 2KS9 | A | 239 | 273 | NA    | NA   |
| 2KS9 | A | 285 | 307 | NA    | NA   | 2KSD | A | 28  | 45  | NA    | NA   | 2KSE | A | 15  | 33  | NA    | NA   |
| 2KSE | A | 160 | 180 | NA    | NA   | 2KSY | A | 5   | 27  | NA    | NA   | 2KSY | A | 34  | 54  | NA    | NA   |
| 2KSY | A | 123 | 148 | NA    | NA   | 2KSY | A | 155 | 179 | NA    | NA   | 2KSY | A | 70  | 91  | NA    | NA   |
| 2KSY | A | 95  | 114 | NA    | NA   | 2LOJ | A | 25  | 44  | NA    | NA   | 2L2T | A | 51  | 76  | NA    | NA   |
| 2L35 | A | 9   | 29  | NA    | NA   | 2L35 | A | 39  | 55  | NA    | NA   | 2L6X | A | 27  | 51  | NA    | NA   |
| 2L6X | A | 60  | 85  | NA    | NA   | 2L6X | A | 91  | 113 | NA    | NA   | 2L6X | A | 122 | 139 | NA    | NA   |
| 2L6X | A | 180 | 204 | NA    | NA   | 2L9U | A | 641 | 671 | NA    | NA   | 2LCK | A | 16  | 40  | NA    | NA   |
| 2LCK | A | 214 | 237 | NA    | NA   | 2LCK | A | 267 | 295 | NA    | NA   | 2LCK | A | 83  | 107 | NA    | NA   |
| 2LCK | A | 116 | 131 | NA    | NA   | 2LCK | A | 172 | 196 | NA    | NA   | 2LKG | A | 15  | 41  | NA    | NA   |
| 2LKG | A | 52  | 69  | NA    | NA   | 2LKG | A | 79  | 97  | NA    | NA   | 2LLY | A | 8   | 30  | NA    | NA   |
| 2LLY | A | 37  | 58  | NA    | NA   | 2LLY | A | 71  | 92  | NA    | NA   | 2LLY | A | 110 | 129 | NA    | NA   |
| 2LNL | A | 38  | 66  | NA    | NA   | 2LNL | A | 75  | 98  | NA    | NA   | 2LNL | A | 112 | 136 | NA    | NA   |
| 2LNL | A | 150 | 173 | NA    | NA   | 2LNL | A | 207 | 225 | NA    | NA   | 2LNL | A | 239 | 267 | NA    | NA   |
| 2LNL | A | 279 | 307 | NA    | NA   | 2LOM | A | 30  | 46  | NA    | NA   | 2LOM | A | 65  | 81  | NA    | NA   |
| 2LOR | A | 65  | 95  | NA    | NA   | 2LOR | A | 19  | 52  | NA    | NA   | 2NQ2 | A | 7   | 24  | 2.400 | 0.22 |
| 2NQ2 | A | 53  | 86  | 2.400 | 0.22 | 2NQ2 | A | 99  | 112 | 2.400 | 0.22 | 2NQ2 | A | 235 | 256 | 2.400 | 0.22 |
| 2NQ2 | A | 311 | 327 | 2.400 | 0.22 | 2NQ2 | A | 117 | 139 | 2.400 | 0.22 | 2NQ2 | A | 147 | 170 | 2.400 | 0.22 |
| 2NQ2 | A | 194 | 214 | 2.400 | 0.22 | 2NQ2 | A | 282 | 303 | 2.400 | 0.22 | 2NR9 | A | 116 | 131 | 2.200 | 0.24 |
| 2NR9 | A | 166 | 191 | 2.200 | 0.24 | 2NR9 | A | 10  | 26  | 2.200 | 0.24 | 2NR9 | A | 63  | 82  | 2.200 | 0.24 |
| 2NR9 | A | 86  | 108 | 2.200 | 0.24 | 2OAR | A | 69  | 99  | 3.500 | 0.32 | 2OAR | A | 13  | 44  | 3.500 | 0.32 |
| 2ONK | C | 2   | 29  | 3.100 | 0.26 | 2ONK | C | 35  | 77  | 3.100 | 0.26 | 2ONK | C | 169 | 198 | 3.100 | 0.26 |
| 2ONK | C | 130 | 152 | 3.100 | 0.26 | 2ONK | C | 226 | 249 | 3.100 | 0.26 | 2Q6H | A | 166 | 183 | 1.850 | 0.20 |
| 2Q6H | A | 191 | 214 | 1.850 | 0.20 | 2Q6H | A | 241 | 255 | 1.850 | 0.20 | 2Q6H | A | 276 | 290 | 1.850 | 0.20 |
| 2Q6H | A | 337 | 368 | 1.850 | 0.20 | 2Q6H | A | 449 | 477 | 1.850 | 0.20 | 2Q6H | A | 483 | 509 | 1.850 | 0.20 |
| 2Q6H | A | 11  | 36  | 1.850 | 0.20 | 2Q6H | A | 44  | 71  | 1.850 | 0.20 | 2Q6H | A | 88  | 123 | 1.850 | 0.20 |
| 2Q6H | A | 375 | 390 | 1.850 | 0.20 | 2Q6H | A | 399 | 423 | 1.850 | 0.20 | 2Q7M | C | 3   | 35  | 4.250 | 0.24 |
| 2Q7M | C | 117 | 138 | 4.250 | 0.24 | 2Q7M | C | 50  | 73  | 4.250 | 0.24 | 2Q7M | C | 81  | 100 | 4.250 | 0.24 |
| 2QDZ | A | 10  | 26  | 3.150 | 0.29 | 2QFI | A | 129 | 141 | 3.800 | 0.32 | 2QKS | A | 103 | 132 | 2.200 | 0.23 |
| 2QKS | A | 42  | 65  | 2.200 | 0.23 | 2QTS | E | 57  | 69  | 1.900 | 0.21 | 2QTS | E | 427 | 460 | 1.900 | 0.21 |
| 2R6G | F | 69  | 90  | 2.800 | 0.24 | 2R6G | F | 277 | 306 | 2.800 | 0.24 | 2R6G | F | 484 | 503 | 2.800 | 0.24 |
| 2R6G | F | 18  | 35  | 2.800 | 0.24 | 2R6G | F | 40  | 55  | 2.800 | 0.24 | 2R6G | F | 365 | 388 | 2.800 | 0.24 |
| 2R6G | F | 426 | 447 | 2.800 | 0.24 | 2R9R | H | 221 | 243 | 2.400 | 0.21 | 2R9R | H | 254 | 274 | 2.400 | 0.21 |
| 2R9R | H | 381 | 416 | 2.400 | 0.21 | 2R9R | H | 160 | 183 | 2.400 | 0.21 | 2R9R | H | 279 | 296 | 2.400 | 0.21 |
| 2R9R | H | 321 | 346 | 2.400 | 0.21 | 2RH1 | A | 103 | 136 | 2.400 | 0.20 | 2RH1 | A | 147 | 169 | 2.400 | 0.20 |
| 2RH1 | A | 197 | 229 | 2.400 | 0.20 | 2RH1 | A | 267 | 298 | 2.400 | 0.20 | 2RH1 | A | 31  | 59  | 2.400 | 0.20 |
| 2RH1 | A | 67  | 95  | 2.400 | 0.20 | 2RH1 | A | 305 | 326 | 2.400 | 0.20 | 2UUI | A | 5   | 32  | 2.000 | 0.20 |
| 2UUI | A | 105 | 141 | 2.000 | 0.20 | 2UUI | A | 44  | 72  | 2.000 | 0.20 | 2UUI | A | 76  | 98  | 2.000 | 0.20 |
| 2VV5 | A | 29  | 58  | 3.450 | 0.29 | 2VV5 | A | 63  | 84  | 3.450 | 0.29 | 2VV5 | A | 111 | 125 | 3.450 | 0.29 |
| 2W1P | A | 41  | 69  | 1.400 | 0.16 | 2W1P | A | 82  | 103 | 1.400 | 0.16 | 2W1P | A | 127 | 151 | 1.400 | 0.16 |
| 2W1P | A | 168 | 188 | 1.400 | 0.16 | 2W1P | A | 200 | 215 | 1.400 | 0.16 | 2W1P | A | 247 | 265 | 1.400 | 0.16 |
| 2WIE | A | 5   | 41  | 2.130 | 0.20 | 2WIE | A | 46  | 76  | 2.130 | 0.20 | 2WLL | B | 121 | 149 | 3.650 | 0.25 |
| 2WLL | B | 60  | 83  | 3.650 | 0.25 | 2WPD | J | 7   | 36  | 3.430 | 0.29 | 2WPD | J | 47  | 73  | 3.430 | 0.29 |
| 2WSC | A | 42  | 55  | 3.300 | 0.36 | 2WSW | A | 128 | 161 | 2.290 | 0.21 | 2WSW | A | 312 | 337 | 2.290 | 0.21 |
| 2WSW | A | 344 | 375 | 2.290 | 0.21 | 2WSW | A | 404 | 434 | 2.290 | 0.21 | 2WSW | A | 16  | 30  | 2.290 | 0.21 |
| 2WSW | A | 103 | 117 | 2.290 | 0.21 | 2WSW | A | 187 | 222 | 2.290 | 0.21 | 2WSW | A | 229 | 247 | 2.290 | 0.21 |
| 2WSW | A | 446 | 465 | 2.290 | 0.21 | 2WSW | A | 469 | 499 | 2.290 | 0.21 | 2WSW | A | 33  | 48  | 2.290 | 0.21 |
| 2WSW | A | 52  | 71  | 2.290 | 0.21 | 2WSW | A | 252 | 275 | 2.290 | 0.21 | 2WSW | A | 279 | 292 | 2.290 | 0.21 |
| 2X2V | A | 3   | 33  | 2.500 | 0.19 | 2X2V | A | 38  | 68  | 2.500 | 0.19 | 2X79 | A | 60  | 86  | 3.800 | 0.28 |
| 2X79 | A | 105 | 133 | 3.800 | 0.28 | 2X79 | A | 210 | 231 | 3.800 | 0.28 | 2X79 | A | 244 | 273 | 3.800 | 0.28 |
| 2X79 | A | 307 | 328 | 3.800 | 0.28 | 2X79 | A | 336 | 356 | 3.800 | 0.28 | 2X79 | A | 428 | 448 | 3.800 | 0.28 |
| 2X79 | A | 143 | 157 | 3.800 | 0.28 | 2X79 | A | 163 | 189 | 3.800 | 0.28 | 2XND | J | 18  | 34  | 3.500 | 0.26 |
| 2XND | J | 51  | 70  | 3.500 | 0.26 | 2XQ2 | A | 11  | 28  | 2.730 | 0.25 | 2XQ2 | A | 280 | 313 | 2.730 | 0.25 |
| 2XQ2 | A | 453 | 472 | 2.730 | 0.25 | 2XQ2 | A | 479 | 501 | 2.730 | 0.25 | 2XQ2 | A | 522 | 544 | 2.730 | 0.25 |
| 2XQ2 | A | 549 | 572 | 2.730 | 0.25 | 2XQ2 | A | 85  | 108 | 2.730 | 0.25 | 2XQ2 | A | 163 | 177 | 2.730 | 0.25 |
| 2XQ2 | A | 187 | 209 | 2.730 | 0.25 | 2XQ2 | A | 349 | 378 | 2.730 | 0.25 | 2XQ2 | A | 392 | 413 | 2.730 | 0.25 |
| 2XQ2 | A | 423 | 447 | 2.730 | 0.25 | 2XQ2 | A | 124 | 156 | 2.730 | 0.25 | 2YEV | A | 64  | 99  | 2.360 | 0.17 |
| 2YEV | A | 107 | 125 | 2.360 | 0.17 | 2YEV | A | 153 | 179 | 2.360 | 0.17 | 2YEV | A | 193 | 224 | 2.360 | 0.17 |
| 2YEV | A | 239 | 272 | 2.360 | 0.17 | 2YEV | A | 279 | 292 | 2.360 | 0.17 | 2YEV | A | 308 | 336 | 2.360 | 0.17 |
| 2YEV | A | 416 | 442 | 2.360 | 0.17 | 2YEV | A | 459 | 489 | 2.360 | 0.17 | 2YEV | A | 558 | 573 | 2.360 | 0.17 |
| 2YEV | A | 580 | 597 | 2.360 | 0.17 | 2YEV | A | 617 | 643 | 2.360 | 0.17 | 2YEV | A | 724 | 756 | 2.360 | 0.17 |

**Helices in membrane set.** Code = PDB Code; C = Chain identifier; St. = Number of first residue in helix; End = Number of last residue in helix; Res. = Resolution (Angstroms); R = R-Factor. NAs in the last two columns indicate the protein structure was solved by a method other than X-ray diffraction.







Table S5 continued. Membrane Helices

| Code | C | St. | End | Res.  | R    | Code | C | St. | End | Res.  | R    | Code | C | St. | End | Res.  | R    |
|------|---|-----|-----|-------|------|------|---|-----|-----|-------|------|------|---|-----|-----|-------|------|
| 3VW7 | A | 266 | 296 | 2.200 | 0.22 | 3VW7 | A | 305 | 338 | 2.200 | 0.22 | 3VW7 | A | 347 | 373 | 2.200 | 0.22 |
| 3VW7 | A | 92  | 131 | 2.200 | 0.22 | 3VW7 | A | 136 | 163 | 2.200 | 0.22 | 3ZUX | A | 251 | 276 | 2.200 | 0.20 |
| 3ZUX | A | 284 | 308 | 2.200 | 0.20 | 3ZUX | A | 15  | 27  | 2.200 | 0.20 | 3ZUX | A | 36  | 54  | 2.200 | 0.20 |
| 3ZUX | A | 67  | 91  | 2.200 | 0.20 | 3ZUX | A | 125 | 137 | 2.200 | 0.20 | 3ZUX | A | 155 | 183 | 2.200 | 0.20 |
| 3ZUX | A | 188 | 214 | 2.200 | 0.20 | 3ZUX | A | 217 | 245 | 2.200 | 0.20 | 4A2N | B | 4   | 28  | 3.400 | 0.24 |
| 4A2N | B | 41  | 61  | 3.400 | 0.24 | 4A2N | B | 75  | 99  | 3.400 | 0.24 | 4A2N | B | 127 | 142 | 3.400 | 0.24 |
| 4A2N | B | 150 | 172 | 3.400 | 0.24 | 4AMJ | B | 205 | 236 | 2.300 | 0.20 | 4AMJ | B | 278 | 313 | 2.300 | 0.20 |
| 4AMJ | B | 33  | 67  | 2.300 | 0.20 | 4AMJ | B | 78  | 104 | 2.300 | 0.20 | 4AMJ | B | 111 | 142 | 2.300 | 0.20 |
| 4AMJ | B | 322 | 343 | 2.300 | 0.20 | 4AMJ | B | 156 | 178 | 2.300 | 0.20 | 4AMJ | B | 15  | 46  | 3.300 | 0.27 |
| 4AMJ | B | 110 | 136 | 3.300 | 0.27 | 4AMJ | B | 216 | 241 | 3.300 | 0.27 | 4AMJ | B | 248 | 266 | 3.300 | 0.27 |
| 4APS | A | 285 | 310 | 3.300 | 0.27 | 4AMJ | A | 329 | 342 | 3.300 | 0.27 | 4APS | A | 355 | 376 | 3.300 | 0.27 |
| 4APS | A | 388 | 401 | 3.300 | 0.27 | 4APS | A | 425 | 439 | 3.300 | 0.27 | 4APS | A | 452 | 470 | 3.300 | 0.27 |
| 4APS | A | 53  | 75  | 3.300 | 0.27 | 4APS | A | 84  | 103 | 3.300 | 0.27 | 4APS | A | 145 | 171 | 3.300 | 0.27 |
| 4APS | A | 175 | 198 | 3.300 | 0.27 | 4AYX | A | 428 | 469 | 2.900 | 0.23 | 4AYX | A | 167 | 201 | 2.900 | 0.23 |
| 4AYX | A | 208 | 257 | 2.900 | 0.23 | 4AYX | A | 268 | 309 | 2.900 | 0.23 | 4AYX | A | 369 | 422 | 2.900 | 0.23 |
| 4AYX | A | 312 | 357 | 2.900 | 0.23 | 4B4A | A | 60  | 88  | 3.500 | 0.25 | 4AYX | A | 101 | 128 | 3.500 | 0.25 |
| 4B4A | A | 146 | 175 | 3.500 | 0.25 | 4B4A | A | 6   | 27  | 3.500 | 0.25 | 4B4A | A | 31  | 44  | 3.500 | 0.25 |
| 4B4A | A | 181 | 202 | 3.500 | 0.25 | 4B4A | A | 207 | 225 | 3.500 | 0.25 | 4DAJ | D | 138 | 170 | 3.400 | 0.25 |
| 4DAJ | D | 182 | 210 | 3.400 | 0.25 | 4DAJ | D | 229 | 254 | 3.400 | 0.25 | 4DAJ | D | 494 | 513 | 3.400 | 0.25 |
| 4DAJ | D | 66  | 94  | 3.400 | 0.25 | 4DAJ | D | 101 | 129 | 3.400 | 0.25 | 4DAJ | D | 522 | 544 | 3.400 | 0.25 |
| 4DJH | B | 219 | 256 | 2.900 | 0.23 | 4DJH | B | 271 | 299 | 2.900 | 0.23 | 4DJH | B | 57  | 86  | 2.900 | 0.23 |
| 4DJH | B | 93  | 121 | 2.900 | 0.23 | 4DJH | B | 129 | 160 | 2.900 | 0.23 | 4DJH | B | 309 | 332 | 2.900 | 0.23 |
| 4DJH | B | 173 | 196 | 2.900 | 0.23 | 4DJH | B | 129 | 160 | 2.900 | 0.23 | 4DJH | B | 309 | 332 | 2.900 | 0.23 |
| 4DJI | A | 127 | 146 | 3.190 | 0.31 | 4DJI | A | 154 | 180 | 3.190 | 0.31 | 4DJI | A | 103 | 117 | 3.190 | 0.31 |
| 4DJI | A | 364 | 393 | 3.190 | 0.31 | 4DJI | A | 154 | 180 | 3.190 | 0.31 | 4DJI | A | 235 | 259 | 3.190 | 0.31 |
| 4DL0 | G | 9   | 58  | 2.910 | 0.21 | 4DJI | A | 410 | 429 | 3.190 | 0.31 | 4DJI | A | 289 | 321 | 3.190 | 0.31 |
| 4DVE | A | 149 | 179 | 2.090 | 0.19 | 4DVE | A | 3   | 23  | 2.090 | 0.19 | 4DVE | A | 55  | 70  | 2.090 | 0.19 |
| 4DVE | A | 12  | 27  | 3.050 | 0.24 | 4DVE | A | 90  | 109 | 2.090 | 0.19 | 4DVE | A | 118 | 143 | 2.090 | 0.19 |
| 4DXW | B | 117 | 154 | 3.050 | 0.24 | 4DXW | B | 38  | 64  | 3.050 | 0.24 | 4DXW | B | 196 | 224 | 3.050 | 0.24 |
| 4EA3 | B | 120 | 153 | 3.010 | 0.25 | 4EA3 | B | 49  | 76  | 3.010 | 0.25 | 4EA3 | B | 85  | 113 | 3.010 | 0.25 |
| 4EA3 | B | 259 | 287 | 3.010 | 0.25 | 4EA3 | B | 164 | 188 | 3.010 | 0.25 | 4EA3 | B | 214 | 241 | 3.010 | 0.25 |
| 4E1Y | A | 220 | 257 | 1.800 | 0.18 | 4EA3 | B | 295 | 320 | 3.010 | 0.25 | 4E1Y | A | 174 | 208 | 1.800 | 0.18 |
| 4E1Y | A | 74  | 106 | 1.800 | 0.18 | 4E1Y | A | 4   | 33  | 1.800 | 0.18 | 4E1Y | A | 43  | 67  | 1.800 | 0.18 |
| 4E1Y | A | 293 | 305 | 1.800 | 0.18 | 4E1Y | A | 111 | 138 | 1.800 | 0.18 | 4E1Y | A | 267 | 290 | 1.800 | 0.18 |
| 4E1Y | A | 293 | 305 | 1.800 | 0.18 | 4E1Y | A | 111 | 138 | 1.800 | 0.18 | 4E1Y | A | 267 | 290 | 1.800 | 0.18 |
| 4EJ4 | A | 207 | 238 | 3.400 | 0.26 | 4EJ4 | A | 45  | 75  | 3.400 | 0.26 | 4EJ4 | A | 83  | 110 | 3.400 | 0.26 |
| 4EJ4 | A | 162 | 186 | 3.400 | 0.26 | 4EJ4 | A | 258 | 286 | 3.400 | 0.26 | 4EJ4 | A | 119 | 150 | 3.400 | 0.26 |
| 4EJ4 | A | 162 | 186 | 3.400 | 0.26 | 4EJ4 | A | 258 | 286 | 3.400 | 0.26 | 4EJ4 | A | 119 | 150 | 3.400 | 0.26 |
| 4EZC | B | 142 | 161 | 2.360 | 0.20 | 4EJ4 | A | 295 | 318 | 3.400 | 0.26 | 4EZC | B | 49  | 63  | 2.360 | 0.20 |
| 4EZC | B | 301 | 326 | 2.360 | 0.20 | 4EZC | B | 173 | 186 | 2.360 | 0.20 | 4EZC | B | 214 | 227 | 2.360 | 0.20 |
| 4F4L | C | 7   | 27  | 3.490 | 0.27 | 4EZC | B | 85  | 104 | 2.360 | 0.20 | 4EZC | B | 249 | 268 | 2.360 | 0.20 |
| 4FC4 | B | 98  | 125 | 2.400 | 0.20 | 4F4L | C | 74  | 92  | 3.490 | 0.27 | 4FC4 | B | 80  | 92  | 2.400 | 0.20 |
| 4FC4 | B | 56  | 73  | 2.400 | 0.20 | 4FC4 | B | 177 | 190 | 2.400 | 0.20 | 4FC4 | B | 219 | 248 | 2.400 | 0.20 |
| 4FC4 | B | 23  | 49  | 2.400 | 0.20 | 4FC4 | B | 150 | 172 | 2.400 | 0.20 | 4FC4 | B | 3   | 20  | 2.400 | 0.20 |
| 4G1U | A | 232 | 253 | 3.010 | 0.27 | 4G1U | A | 7   | 26  | 3.010 | 0.27 | 4G1U | A | 55  | 79  | 3.010 | 0.27 |
| 4G1U | A | 92  | 104 | 3.010 | 0.27 | 4G1U | A | 279 | 298 | 3.010 | 0.27 | 4G1U | A | 309 | 325 | 3.010 | 0.27 |
| 4G1U | A | 191 | 218 | 3.010 | 0.27 | 4G1U | A | 115 | 139 | 3.010 | 0.27 | 4G1U | A | 145 | 168 | 3.010 | 0.27 |
| 4GBY | A | 191 | 217 | 2.810 | 0.23 | 4GBY | A | 125 | 152 | 2.810 | 0.23 | 4GBY | A | 160 | 186 | 2.810 | 0.23 |
| 4GBY | A | 313 | 334 | 2.810 | 0.23 | 4GBY | A | 277 | 306 | 2.810 | 0.23 | 4GBY | A | 370 | 384 | 2.810 | 0.23 |
| 4GBY | A | 8   | 29  | 2.810 | 0.23 | 4GBY | A | 341 | 363 | 2.810 | 0.23 | 4GBY | A | 443 | 461 | 2.810 | 0.23 |
| 4GBY | A | 8   | 29  | 2.810 | 0.23 | 4GBY | A | 341 | 363 | 2.810 | 0.23 | 4GBY | A | 443 | 461 | 2.810 | 0.23 |
| 4GRV | A | 405 | 423 | 2.810 | 0.23 | 4GBY | A | 50  | 80  | 2.810 | 0.23 | 4GRV | A | 84  | 103 | 2.810 | 0.23 |
| 4GRV | A | 139 | 171 | 2.800 | 0.23 | 4GRV | A | 61  | 87  | 2.800 | 0.23 | 4GRV | A | 99  | 126 | 2.800 | 0.23 |
| 4GRV | A | 302 | 331 | 2.800 | 0.23 | 4GRV | A | 187 | 207 | 2.800 | 0.23 | 4GRV | A | 233 | 265 | 2.800 | 0.23 |
| 4H33 | A | 68  | 92  | 3.100 | 0.28 | 4GRV | A | 341 | 373 | 2.800 | 0.23 | 4H33 | A | 15  | 37  | 3.100 | 0.28 |
|      |   |     |     |       |      | 4HKR | A | 237 | 270 | 3.350 | 0.28 | 4HKR | A | 276 | 323 | 3.350 | 0.28 |

**Helices in membrane set.** Code = PDB Code; C = Chain identifier; St. = Number of first residue in helix; End = Number of last residue in helix; Res. = Resolution (Angstroms); R = R-Factor. NAs in the last two columns indicate the protein structure was solved by a method other than X-ray diffraction.
